# 1 Changes in global repression 2 underlie the evolution of *Drosophila* 3 abdominal pigmentation

4 Iván D. Méndez-González<sup>1</sup>, Thomas M. Williams<sup>2</sup>, Mark Rebeiz<sup>1\*</sup>

\*For correspondence:  
[rebeiz@pitt.com](mailto:rebeiz@pitt.com) (MR)

5 <sup>1</sup>Department of Biological Sciences, University of Pittsburgh, Pittsburgh, Pennsylvania,  
6 USA; <sup>2</sup>Department of Biology, University of Dayton, Dayton, Ohio, USA

---

## 8 Abstract

9 Changes in gene regulation represent an important path to generate developmental differences  
10 affecting anatomical traits. Interspecific divergence in gene expression often results from  
11 changes in transcription-stimulating enhancer elements. While gene repression is crucial for  
12 precise spatiotemporal expression patterns, the relative contribution of repressive  
13 transcriptional silencer to regulatory evolution remains to be addressed. Here, we show that the  
14 *Drosophila* pigmentation gene *ebony* has mainly evolved through changes in the spatial domains  
15 of silencers patterning its abdominal expression. By precisely editing the endogenous *ebony*  
16 locus of *D. melanogaster*, we demonstrate the requirement of two redundant abdominal  
17 enhancers and three silencers that repress the redundant enhancers in a patterned manner. We  
18 observe a role for changes in these silencers in every case of *ebony* evolution observed to date.  
19 Our findings suggest that negative regulation by silencers likely has an under-appreciated role in  
20 gene regulatory evolution.

---

## 22 Introduction

23 Morphological evolution largely depends on changes in the expression of key developmental genes  
24 and their downstream target genes (*Carroll, 2008; Prud'homme et al., 2006*). At the core of this  
25 process are *cis*-regulatory sequences known as enhancers, which are responsible for activating  
26 transcription in a specific spatiotemporal pattern (*Howard and Davidson, 2004*). Enhancers have  
27 been the focus of gene regulatory studies for several good reasons: they are typically discovered  
28 through reporter assays that test sufficiency and are most commonly found when a regulatory re-  
29 gion is dissected. Although enhancers provide a good approximation of gene expression patterns,  
30 oftentimes they do not fully recapitulate the endogenous gene expression (*Barolo, 2012*). This  
31 highlights the importance of other types of regulatory sequences, including boundary elements  
32 (*Yokoshi et al., 2020*), Polycomb response elements (*Sengupta et al., 2004*), silencers (*Segert et al.,*  
33 *2021*), and sequences that lie at the outskirts of minimally defined enhancers (*Lopez-Rivera et al.,*  
34 *2020*), which interact with enhancers to accomplish precise spatiotemporal patterns of expression.  
35 Hence, a key task to understand the evolution of gene regulation is to pinpoint the influence of  
36 regulatory elements beyond enhancers, and every example provides key precedents that expand  
37 our conception of possible mechanisms.

38 Transcriptional repression has long been appreciated as an integral component of gene regula-  
39 tion (*Jacob and Monod, 1961; Johnson, 1995; Payankulam et al., 2010*). Transcriptional silencers  
40 are *cis*-regulatory sequences that repress transcription from otherwise active promoters (*Halfon,*

41 **2020**). Recent evidence hints at the widespread prevalence of silencers in animal genomes (*Gis-*  
42 *selbrecht et al., 2020; Pang and Snyder, 2020; Ngan et al., 2020*). However, the difficulty of ge-  
43 nomically identifying and functionally characterizing these regulatory elements (*Halfon, 2020*) has  
44 limited our ability to test whether the modification of silencer function could be a general mech-  
45 anism of morphological evolution (but see (*Johnson et al., 2015*)). Many mechanisms have been  
46 proposed for silencer function, from promoter-proximal mechanisms involving histone methyla-  
47 tion, to distal elements capable of repressing at long ranges (*Segert et al., 2021*). Because of the  
48 long-range character of these elements, they are very difficult to identify by traditional reporter  
49 tests of sufficiency. Moreover, since these regulatory elements are able to completely shut down  
50 transcription in a patterned manner, they may represent a substantial source of phenotypically  
51 relevant genetic variation.

52 *Drosophila* melanic pigmentation represents a rapidly evolving trait that has provided many in-  
53 sights into regulatory and morphological evolution (*Rebeiz and Williams, 2017*). In particular, the  
54 *ebony* gene presents an intriguing model for understanding regulatory evolution because of its  
55 negative regulatory elements. *ebony* encodes an enzyme that decreases the production of black  
56 melanin pigments (*Wittkopp et al., 2002a*). In *D. melanogaster* males, *ebony* expression anticorrela-  
57 tes with the melanic pigments that adorn the adult abdomen, as it is restricted from the posterior  
58 part of the abdominal segments A2-A4 and down-regulated in entire A5 and A6 segments (*Rebeiz*  
59 *et al., 2009*). This expression pattern is controlled by multiple regulatory elements (**Figure 1A**) (*Re-*  
60 *beiz et al., 2009; Akiyama et al., 2022*). An upstream enhancer drives expression in the entire  
61 abdomen (hereafter referred as *eAct*) (*Rebeiz et al., 2009*). A promoter-proximal silencer represses  
62 *ebony* in the A5 and A6 segments of males (hereafter referred as *eMS*) (*Rebeiz et al., 2009*). And an  
63 intronic silencer represses *ebony* in the most posterior region of each segment (hereafter referred  
64 as *eSS*) (*Rebeiz et al., 2009*). Recently, it was found that *eAct* also functions as a dorsal midline si-  
65 lencer and that it controls *ebony* abdominal expression together with yet unidentified redundant  
66 enhancers (*Akiyama et al., 2022*).

67 *ebony* has been implicated repeatedly in the evolution of *Drosophila* pigmentation, and in all  
68 cases, *cis*-regulatory rather than coding changes were involved (*Rebeiz et al., 2009; Ordway et al.,*  
69 *2014; Johnson et al., 2015; Signor et al., 2016; Liu et al., 2019*). For instance, it was shown that the  
70 function of *eMS* is conserved in *D. prostipennis* and *D. yakuba* (*Ordway et al., 2014; Liu et al., 2019*),  
71 but not in *D. serrata* nor *D. santomea*, two species that secondarily lost male A5 and A6 melanic  
72 pigmentation (*Johnson et al., 2015; Liu et al., 2019*). Relatedly, this silencer's function was found  
73 to be polymorphic in *D. auraria* (*Johnson et al., 2015*). These findings are illustrative examples that  
74 morphological evolution can evolve via silencer inactivation to increase gene expression. The diver-  
75 sity of melanic pigmentation patterns (**Figure 1B**) that correlate with *ebony* abdominal expression  
76 (*Hughes et al., 2020; Signor et al., 2016*) presents an opportune system in which to investigate how  
77 regulatory evolution might recurrently proceed in the context of a complex regulatory architecture.

78 Here, we investigated the *cis*-regulatory evolution of *ebony* in *D. melanogaster* and relatives dis-  
79 playing a range of pigmentation phenotypes (**Figure 1B**). We found that changes in the function  
80 of silencers, rather than enhancers, have contributed to the most salient differences in *ebony* ex-  
81 pression among *Drosophila* species with divergent melanic pigmentation. We identified a novel  
82 silencer that seemingly evolved within an abdominal enhancer, functionally equivalent silencers  
83 with different genomic locations, and spatial expansions in the domain of a silencer's function. Al-  
84 together, these data illustrate multiple manners in which differential negative regulation resulting  
85 from changes in the function of transcriptional silencers can contribute to phenotypic diversity.

## 86 **Results**

### 87 **Redundant enhancers contribute to *ebony* abdominal expression in *D. melanogaster***

88 A recent study found that deleting the main abdominal enhancer (*eAct*) does not notably affect  
89 *ebony* expression, suggesting the presence of redundant enhancers (*Akiyama et al., 2022*). How-

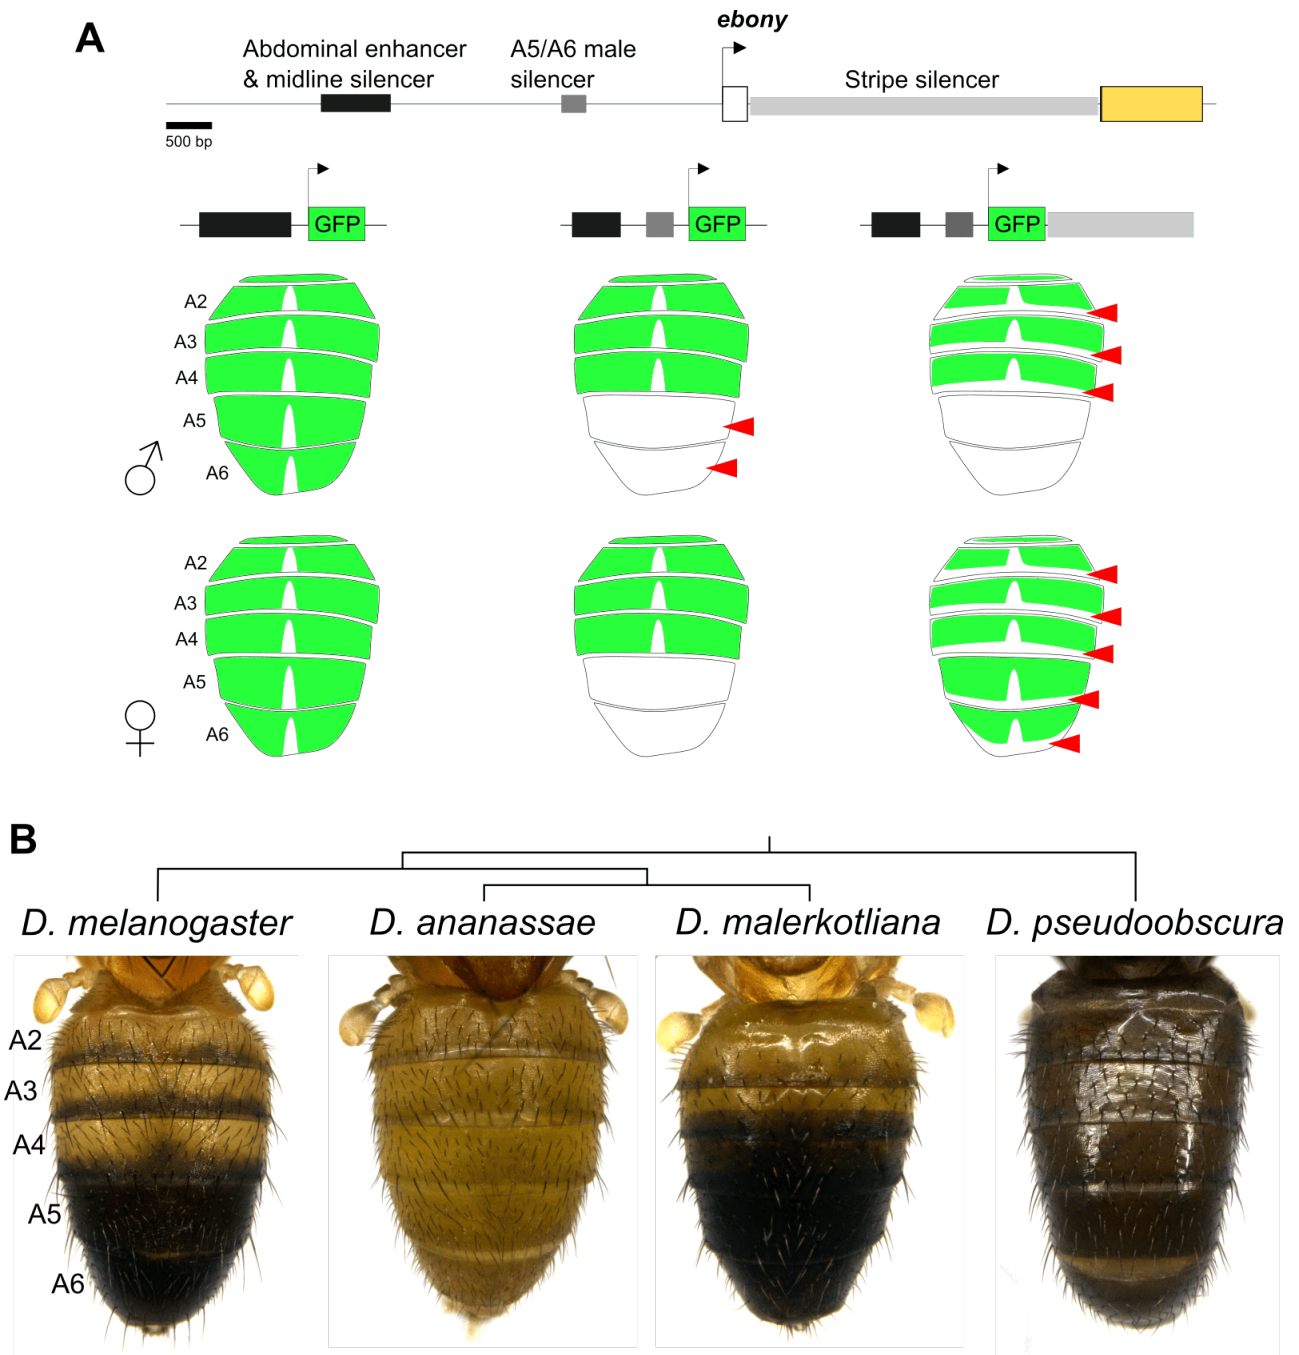

**Figure 1.** *ebony* abdominal expression is patterned by multiple regulatory elements. **(A)** Gene map of the *ebony* locus showing the location of known enhancers and transcriptional silencers active in the abdomen of *D. melanogaster*. The cartoons below represent the GFP reporter expression of the upstream enhancer alone and in combination with the two silencers. **(B)** Phylogeny showing the abdominal pigmentation of males from different *Drosophila* species.

90 ever, the number and location of such enhancers has not been determined. We used CRISPR-Cas9  
91 to create a series of deletions aiming to identify the redundant enhancer(s) (**Figure 2B-C**). *ebony*  
92 null mutants develop a darker pigmentation compared to wild type controls (WT, **Figure 2A**), set-  
93 ting the expectation that flies will become *ebony*-like once all redundant enhancers are removed.  
94 Deletion of *eAct* did not affect the abdominal pigmentation intensity (**Figure 2D-D', J-K**), confirming  
95 previous results (**Akiyama et al., 2022**). We wondered whether important sequences that maintain  
96 WT levels of *ebony* expression reside outside of the deleted region. To test this, we deleted an ex-  
97 panded region centered on *eAct* $\Delta$  (*eActB* $\Delta$ ), and the entire upstream region (*eUps* $\Delta$ ). Both deletions  
98 resulted in slightly darker flies compared to WT, although still considerably lighter than *ebony* null  
99 mutants (**Figure 2E-F, J-K**).

100 Even though these deletions only had a mild effect in the adult pigmentation, we wondered  
101 if they had any effect on *ebony* expression. We analyzed *ebony* mRNA in the abdomen of flies at  
102 the eclosion stage using *in situ* hybridization. While all deletion backgrounds showed WT levels of  
103 expression, deletions overlapping the *eAct* region resulted in *ebony* de-repression along the dorsal  
104 midline (**Figure 2–Figure Supplement 1**). These expression patterns correlate with the adult pig-  
105 mentation of these lines in which the dorsal midline melanic stripe is erased (**Figure 2–Figure Sup-  
106 plement 1B-I**) and confirm the function of this region as a silencer (**Akiyama et al., 2022**). These  
107 results suggest that redundant enhancer(s) located outside the *ebony* upstream region work to-  
108 gether with the element in the *eActB* region to ensure WT levels of expression in the abdomen.

109 To identify the redundant enhancer(s), we focused on a candidate region located within the  
110 first *ebony* intron (*eIN.4*, **Figure 2A**). This region was identified as a putative abdominal enhancer in  
111 *Drosophila* species from the *ananassae* subgroup (**Signor et al., 2016**). Importantly this candidate re-  
112 gion does not overlap with the intronic stripe silencer *eSS* (see below). We reasoned that a possible  
113 redundant enhancer could be identified by deleting this region in the *eActB* $\Delta$  or *eUps* $\Delta$  backgrounds.  
114 The deletion of the candidate region alone (*eIN.4* $\Delta$ ) did not affect the pigmentation (**Figure 2G-G**).  
115 However, both double deletions, *eActB+IN.4* $\Delta$  and *eUps+IN.4* $\Delta$ , resulted in much darker pigmen-  
116 tation compared to the single deletions and approaching to the pigmentation of *ebony* mutants  
117 (**Figure 2H-K**). Thus, *eIN.4* functions as a partially redundant enhancer working together with *eActB*  
118 to drive robust *ebony* expression in the abdomen.

119 Although we focused on the abdominal pigmentation, we noticed that other tissues including  
120 the head, thorax, legs, halteres, and wings of *eUps+IN.4* $\Delta$  had a darker pigmentation compared to  
121 WT (**Figure 2–Figure Supplement 2**). Enhancers responsible for *ebony* expression in these tissues  
122 have been mapped to the upstream region (**Rebeiz et al., 2009**). However, the pigmentation of  
123 these tissues in *eActB* $\Delta$  and *Ups* $\Delta$  appears WT (**Figure 2–Figure Supplement 2**). Thus, *eIN.4* repre-  
124 sents a redundant enhancer that is active in multiple adult tissues. Altogether, these experiments  
125 revealed a complex mechanism for *ebony* regulation in which upstream tissue-specific enhancers  
126 collaborate with an intronic epidermal redundant enhancer to ensure robust expression in the  
127 adult cuticle.

### 128 ***ebony* abdominal silencers are active in specific spatial domains**

129 Gene reporter analysis suggests that *ebony* repression in the male A5 and A6 segments is mediated  
130 by a silencer referred as *eMS* (**Rebeiz et al., 2009**). To confirm the function of *eMS* in its endogenous  
131 context, we created a deletion targeting this region (**Figure 3A**). While the A5-A6 pigmentation was  
132 not affected in *eMS* $\Delta$  (**Figure 3B-C, F**), we observed higher *ebony* mRNA expression compared to WT  
133 as measured by *in situ* hybridization (**Figure 3D-E**). These experiments confirm that *eMS* is necessary  
134 to repress *ebony* in the A4 and A5 male segments. The lack of phenotypic effects can be explained  
135 by the high expression of genes with an opposite function to *ebony*, like *tan* and *yellow* (**Wittkopp  
136 et al., 2002b; Camino et al., 2015**).

137 *ebony* expression is also repressed in the area where the posterior melanic stripes develop  
138 by an intronic silencer referred as *eSS* (**Rebeiz et al., 2009**). We narrowed down the exact loca-  
139 tion of this silencer using nuclear-localized Green Fluorescent Protein (or GFP) reporter constructs



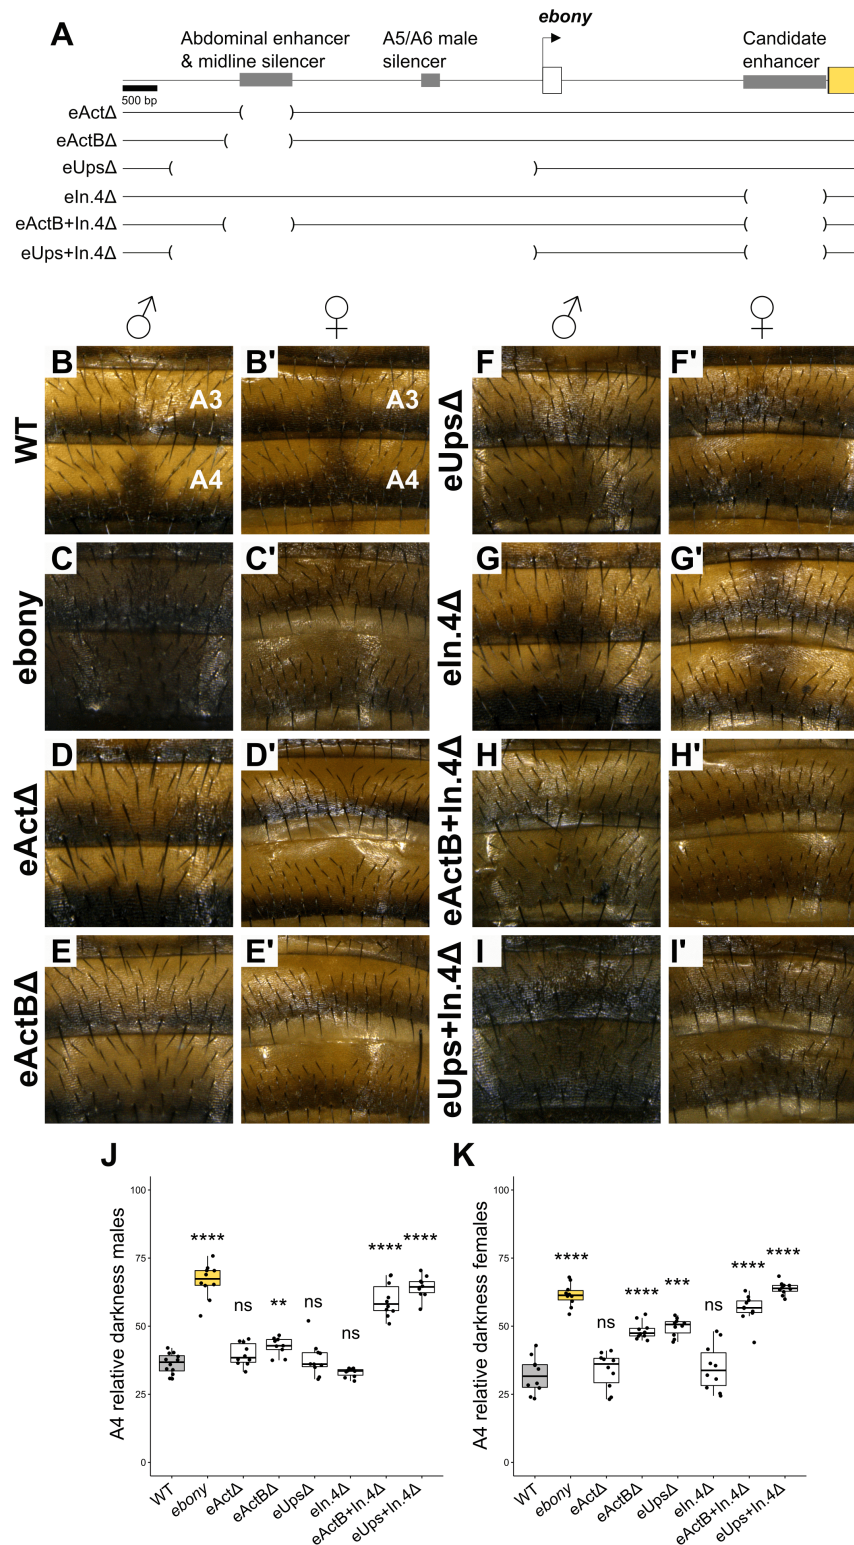

**Figure 2.** *ebony* abdominal expression is controlled by redundant enhancers. **(A)** Gene map of the *ebony* locus showing the location of the deletions created to identify redundant enhancers. **(B-I')** A3 and A4 pigmentation of WT, *ebony* null mutants, and deletion lines males and females. **(J-K)** Quantification of the A4 relative darkness of males **(J)** and females **(K)**. Significant differences are shown compared to WT. (Student's t test, ns = not significant, \* $p < 0.5$ , \*\* $p < 0.05$ , \*\*\* $p < 0.005$ , \*\*\*\* $p < 0.0005$ )

**Figure 2-Figure supplement 1.** *ebony* abdominal *mRNA* expression correlates with pigmentation phenotypes

**Figure 2-Figure supplement 2.** The redundant intronic enhancer is active in multiple adult tissues

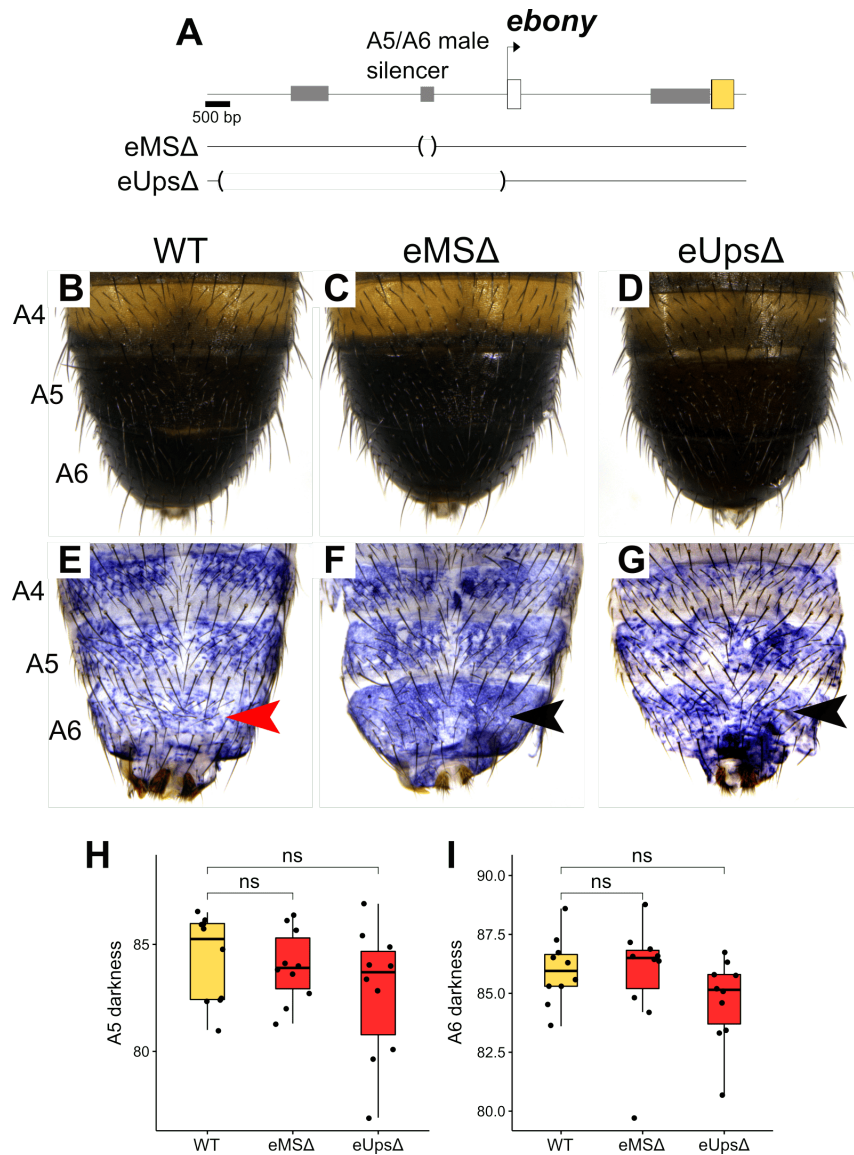

**Figure 3.** Necessity of the *ebony* A5/A6 male silencer. **(A)** Gene map of the *ebony* locus showing the location of the deletion targeting the A5/A6 male silencer (*eMSΔ*). **(B-D)** A4, A5, and A6 pigmentation of WT, *eMSΔ*, and *eUpsΔ* males. **(E-G)** *in-situ* hybridization detecting *ebony* mRNA in A4, A5 and A6 segments of WT, *eMSΔ*, and *eUpsΔ* males. Red and black arrowheads indicate low and increased levels of *ebony* mRNA, respectively. **(F)** Comparison of A5 and A6 darkness between WT, *eMSΔ*, and *eUpsΔ* males. (Student's t test, ns = not significant).

**Figure 3-Figure supplement 1.** Identification of the stripe silencer within the first *ebony* intron

**Figure 3-Figure supplement 2.** Necessity of the *ebony* stripe silencer

140 containing fragments of the *ebony* first intron. A region of 1.5 kb located downstream of the  
141 *ebony* promoter (*eUps+In.1*) showed low GFP expression in the stripe area (**Figure 3–Figure Sup-**  
142 **plement 1**). The endogenous deletion of this region resulted in *ebony* de-repression in the stripe  
143 area and thinner melanic stripes compared to the WT (**Figure 3–Figure Supplement 2**), confirm-  
144 ing that this region is *eSS*. Together, these experiments show that the silencers *eMS* and *eSS* are  
145 necessary and sufficient to repress the *ebony* redundant enhancers in specific spatial domains.

### 146 **Changes in the function of silencers drive the evolution of *ebony* expression among** 147 ***Drosophila* species**

148 To understand how *ebony* expression has evolved, we analyzed its regulation in three additional  
149 *Drosophila* species. *ebony* has been identified as a major driver of pigmentation diversity within  
150 the *ananassae* species subgroup (*Signor et al., 2016*). Thus, we selected two species from this  
151 group with contrasting abdominal pigmentation, *D. ananassae* (non-melanic) and *D. malerkotliana*  
152 (A4, A5 and A6 melanic). We also included *D. pseudoobscura*, a completely melanic species which  
153 displays very low levels of *ebony* expression (*Hughes et al., 2020*) (**Figure 4A**). We created three  
154 reporter constructs for each species, containing the region orthologous to the upstream abdomi-  
155 nal enhancer (*eAct*), the entire upstream region (*eUps*), and the upstream and first intronic region  
156 (*eUps+IN*, **Figure 4B**). These constructs were tested for GFP activity in the A4-A6 segments of trans-  
157 genic *D. melanogaster* males 24 hours (h) after eclosion.

158 We found that the activator region of *D. ananassae* drives reporter expression in all abdominal  
159 segments (**Figure 4C**). Qualitatively, this expression pattern did not change when the full upstream  
160 region (**Figure 4D**) or upstream together with the intronic regions were analyzed (**Figure 4E**). These  
161 results suggest that in *D. ananassae*, *ebony* abdominal expression is controlled by an upstream  
162 enhancer (**Figure 4L**).

163 For *D. malerkotliana*, we found that the activator and the upstream region drive uniform GFP  
164 expression in all abdominal segments (**Figure 4F-G**). This reporter activity does not recapitulate  
165 *ebony* the endogenous expression of *D. malerkotliana*, which is restricted from the A4, A5, and A6  
166 segments (**Figure 4B**, (*Signor et al., 2016*)). However, when the intronic region was included, the ex-  
167 pression in A5 and A6 was silenced (**Figure 4H**), suggesting the presence of an intronic A5-A6 male-  
168 specific silencer. The lack of A4 repression, which is observed in the *ebony* endogenous expression  
169 in this species, could result from changes in the trans landscape compared to *D. melanogaster*, or  
170 an unidentified A4 silencer. We noticed that the *D. malerkotliana eUps+IN* reporter also repressed  
171 GFP expression in the stripe area (**Figure 4D, G**). This suggests that this species contains intronic  
172 silencer(s) active in both the A5-A6 segments and in the stripe area. We hypothesized that the  
173 male silencer is located in an intronic region implicated in the pigmentation differences between  
174 *D. malerkotliana* and its sister species *D. malerkotliana pallens* (*Signor et al., 2016*), while the stripe  
175 silencer might be orthologous to the *D. melanogaster eSS*. GFP expression of a reporter containing  
176 the upstream and the candidate intronic regions (*eUps+IN.4*) was repressed in A5-A6, but not in the  
177 stripe area (**Figure 4–Figure Supplement 1**). Thus, the *IN.4* region contains the male silencer and  
178 might indeed underlie the pigmentation differences between *D. malerkotliana* and its sister species,  
179 while the stripe silencer seems to be conserved with respect to that of *D. melanogaster* (**Figure 4–**  
180 **Figure Supplement 1**). These results suggest that in *D. malerkotliana*, *ebony* abdominal expression  
181 is controlled by an upstream enhancer and at least two tissue-specific silencers (**Figure 4M**).

182 For *D. pseudoobscura*, we found that the activator region drives GFP expression in A4-A6 seg-  
183 ments in a similar pattern to *D. ananassae* and *D. malerkotliana* (**Figure 4I**). This was surprising  
184 considering that the endogenous expression of *ebony* in *D. pseudoobscura* is almost undetectable  
185 (*Hughes et al., 2020*). However, when the full upstream region was analyzed, we found no GFP  
186 expression throughout the abdomen (**Figure 4J**). This suggests that *D. pseudoobscura* has a func-  
187 tional abdominal enhancer, which is repressed by a silencer located between this enhancer and the  
188 *ebony* promoter. When the upstream and intronic regions were analyzed together, we observed  
189 GFP expression only in A6 albeit at low levels (**Figure 4K**). We analyzed the reporter expression of



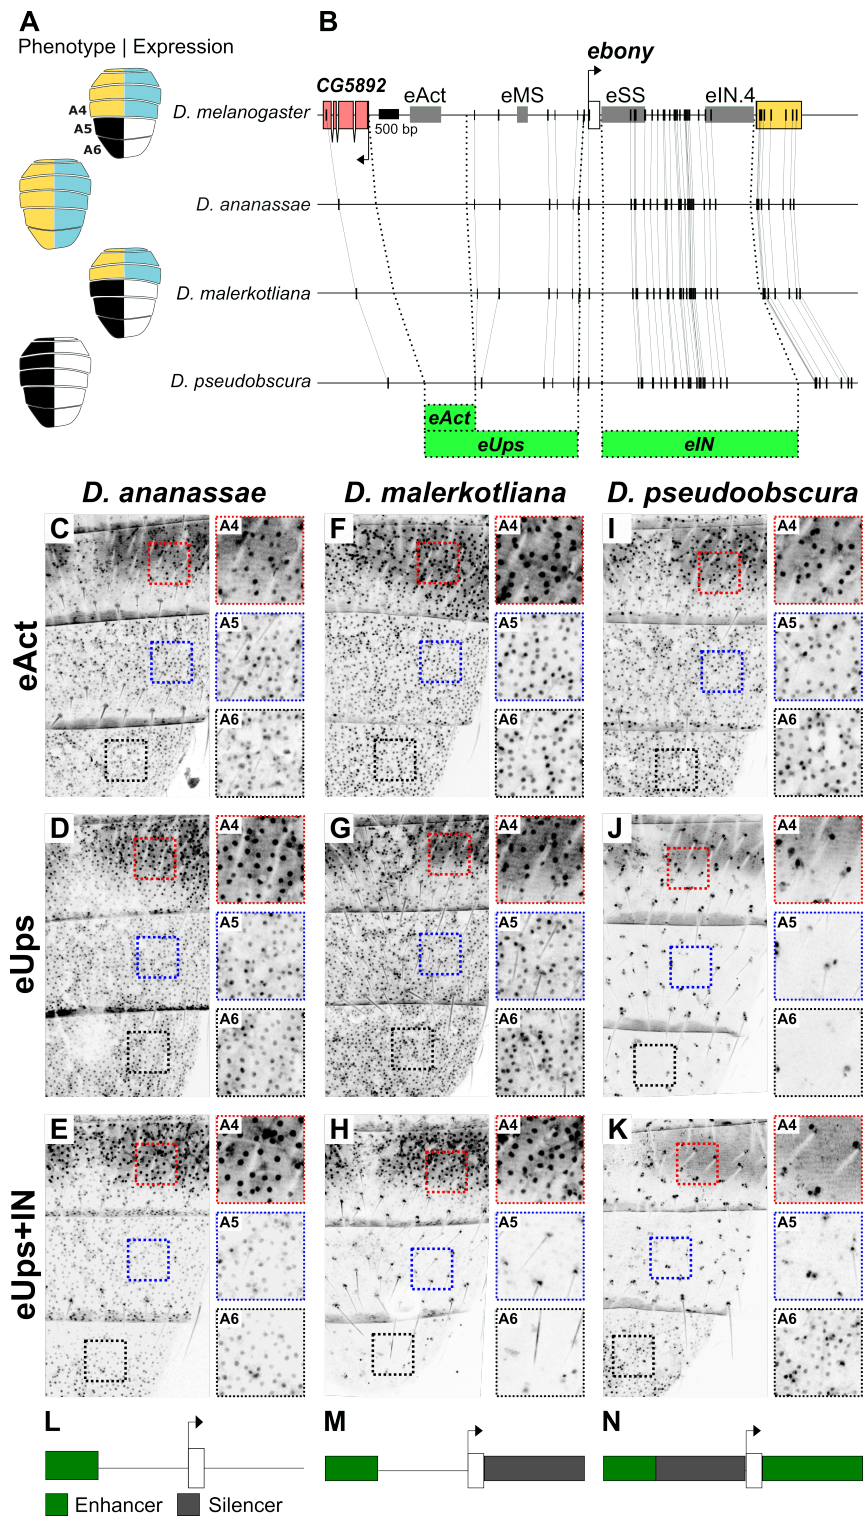

**Figure 4.** Changes in the location and function of transcriptional silencers among *Drosophila* species. **(A)** Cartoons representing the pigmentation phenotype (left) and the *ebony* expression pattern (right, blue color) of *D. melanogaster*, *D. ananassae*, *D. malerkotliana*, and *D. pseudoobscura*. **(B)** Gene map showing the location of the *ebony* CREs in *D. melanogaster* (top). Vertical lines indicate conserved regions, while dashed lines indicate the fragments used to create reporter constructs (green, bottom). **(C-K)** GFP expression patterns of the indicated transgenic reporters in the posterior abdominal segments A4-A6. Insets show magnified regions for A4 (red square) A5 (blue square), and A6 (black square). All flies were imaged 24 h post eclosion. **(L-N)** Inferred *ebony* regulatory architecture showing the approximate location of abdominal enhancers (green) and silencers (gray).

**Figure 4-Figure supplement 1.** The *ebony* male and stripe silencers of *D. malerkotliana* are located in distinct intronic regions

**Figure 4-Figure supplement 2.** Enhancer activity of the *ebony* intronic region from *D. pseudoobscura*

**Figure 4-Figure supplement 3.** The melanic dorsal midline is novel to *D. melanogaster*

190 the intronic region alone and found it to be A6 specific (**Figure 4–Figure Supplement 2**). These data  
191 suggest that the low *ebony* abdominal expression of *D. pseudoobscura* (**Hughes et al., 2020**) results  
192 from a silencer that represses *eAct* in all abdominal segments but seems unable to repress the A6  
193 intronic enhancer (**Figure 4N**).

### 194 **Evolution of the melanic dorsal midline through the gain of a novel silencer**

195 The melanic stripe that forms along the dorsal midline in *D. melanogaster* (**Figure 1B**) is regarded as  
196 characteristic of species within the subgenus *Sophophora* (**Markow and O’Grady, 2005**). However,  
197 we have not observed this pigmentation trait in species from the *ananassae* or *montium* subgroups.  
198 Given that the formation of the melanic dorsal midline requires *ebony* repression via the silencer  
199 activity of *eAct* (**Figure 2–Figure Supplement 1**) (**Akiyama et al., 2022**), we wondered about the evolu-  
200 tion of this silencer function. We found that the *eAct* transgenic reporter of the three species stud-  
201 ied here drive robust GFP expression along the dorsal midline (**Figure 4–Figure Supplement 3A**),  
202 suggesting that none of these species contain a functional midline silencer. To expand our phylo-  
203 genetic sample, we analyzed the *ebony* midline expression and silencer function using published  
204 data for *D. prostipennis*, *D. serrata*, *D. auraria*, *D. yakuba*, and *D. santomea* (**Ordway et al., 2014**;  
205 **Johnson et al., 2015**; **Liu et al., 2019**). None of these species showed evidence of *ebony* midline  
206 repression or of a functional midline silencer (**Figure 4–Figure Supplement 3B**). Thus, the silencer  
207 function of *eAct* seems to be novel to *D. melanogaster* and may have contributed to the evolution  
208 of the melanic dorsal midline.

### 209 **Discussion**

210 The importance of silencers for patterning gene expression in metazoans has long been recognized  
211 (**Brand et al., 1985**). However, this mode of negative regulation has been difficult to study due to  
212 limited examples and heterogeneous mechanisms of action (**Halfon, 2020**; **Segert et al., 2021**). We  
213 showed that multiple silencers are required for patterning spatial and sex-specific *ebony* abdominal  
214 expression, and that changes in the function of these silencers have resulted in altered expression  
215 patterns contributing to variation in abdominal pigmentation. Interestingly, the ability of *ebony*  
216 silencers to antagonize redundant enhancers appears to be case-specific. Below, we reconstruct  
217 the evolution of the *ebony* regulatory architecture and discuss how current experimental practices  
218 might obscure the significance of silencer evolution in the study of regulatory evolution (**Figure 5**).

### 219 **Evolutionary history of a complex regulatory architecture**

220 *D. melanogaster* has evolved a complex assemblage of two enhancers and three tissue-specific si-  
221 lencers required for shaping *ebony* abdominal expression. Comparative analysis of our reporter  
222 constructs suggests that each *ebony cis*-regulatory element has a unique evolutionary history (**Fig-  
223 ure 5A**). The upstream enhancer (*eAct*) seems to have evolved, at least, in the common ances-  
224 tor of the *melanogaster-obscura* species groups. However, the dual function of this region as a  
225 dorsal midline silencer (**Akiyama et al., 2022**) appears novel to *D. melanogaster*, where it seems  
226 to have contributed to the evolution of the melanic dorsal midline. Regarding *eMS*, we propose  
227 that the common ancestor of the *melanogaster-obscura* groups possessed a functional upstream  
228 silencer, as *D. pseudoobscura* also contains an upstream silencer (which is active in both sexes).  
229 After the divergence of these lineages, this silencer acquired a male-specific function specifically  
230 in the *melanogaster* group, which coincides with the evolution of male-specific melanic pigmen-  
231 tation (**Jeong et al., 2006**). However, the *ananassae* subgroup seems to have gained an intronic  
232 male-silencer, while losing the upstream silencer activity. Interestingly, the *D. malerkotliana* male-  
233 silencer maps to the same genomic region as the redundant intronic enhancer of *D. melanogaster*.  
234 Although challenging, future work involving these intronic regulatory elements might help to eluci-  
235 date how enhancer logic and silencer logic could interconvert.



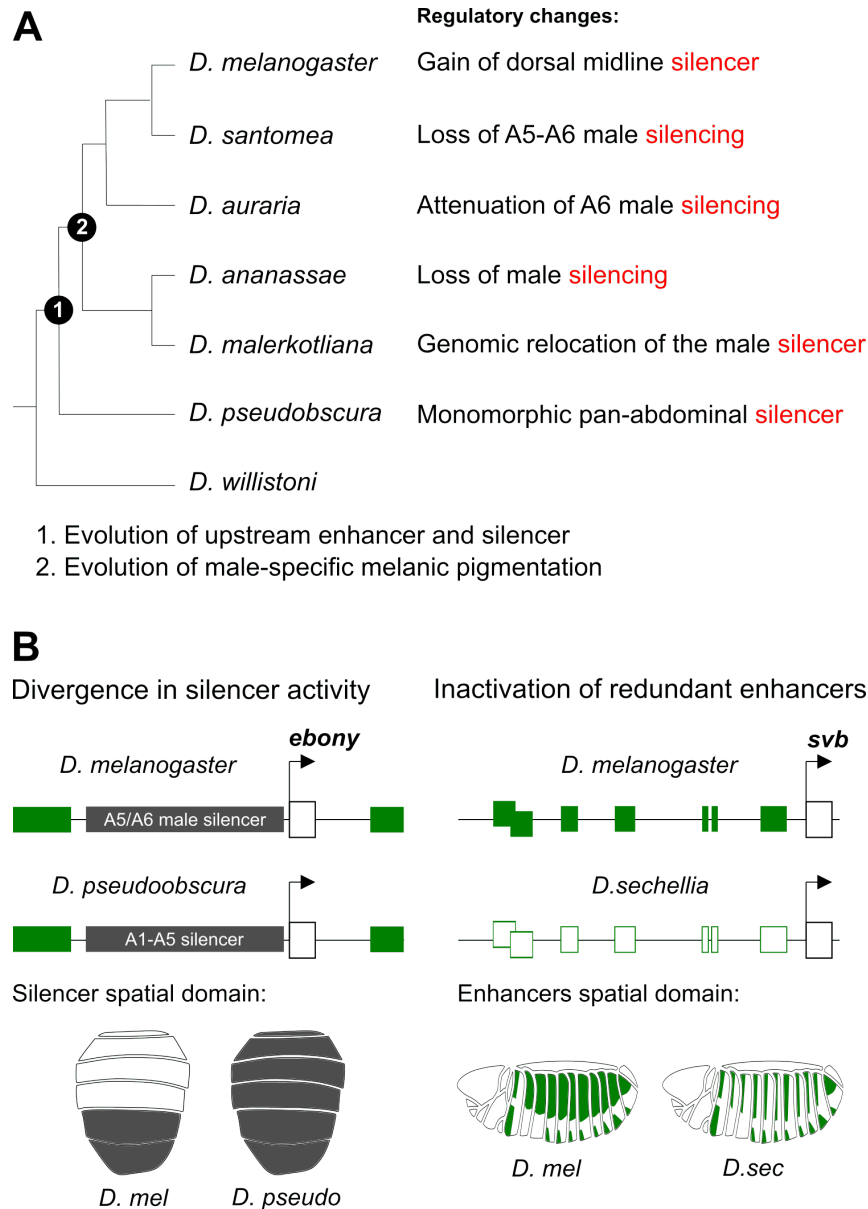

**Figure 5.** Changes in the function of silencers drive the regulatory evolution of *ebony* abdominal expression. **A)** Summary of *ebony* regulatory changes in *Drosophila* species from this and previous studies, and in relation to the evolution of male-specific melanic pigmentation. The second column shows the inferred regulatory changes in each species. **B)** Two possible mechanisms leading to morphological evolution through loss of tissue-specific expression. Left, *ebony* repression by an abdominal silencer contributes to the dark pigmentation of *D. pseudoobscura*. Right, inactivation of *shavenbaby* (*svb*) enhancers decreases the number of trichomes in *D. sechellia* compared to *D. melanogaster*. In both panels, green boxes represent functional enhancers.

## 236 **Loss of expression by increased negative regulation of a functional enhancer**

237 The characteristic dark pigmentation of *D. pseudoobscura* correlates with low *ebony* expression  
238 and high *yellow* expression (Hughes et al., 2020; Wittkopp et al., 2002b). Unexpectedly, we found  
239 that this species has a functional *ebony* abdominal enhancer that is likely homologous to the  
240 *D. melanogaster eAct*. However, a silencer active throughout the abdomen strongly represses this  
241 enhancer. Of note, the ubiquitous silencer of *D. pseudoobscura* is not able to repress the A6 in-  
242 tronic enhancer. This provides an important exception to the observed trend that *ebony* silencers  
243 are global rather than selective. Silencers appear to comprise multiple functional classes, char-  
244 acterized by distinct associated proteins and interactions with other regulatory elements (Segert  
245 et al., 2021). Gisselbrecht et al. (2020) found that embryonic silencers bound by the Snail repressor  
246 likely function by preventing nearby enhancers from activating the transcription of target genes.  
247 Snail-unbound silencers, on the contrary, seem to loop directly to promoters where they recruit  
248 repressive activities. The second class, thus, would result in repression regardless of enhancer re-  
249 dundancy. Investigating the mechanisms of the *ebony* enhancers and silencers may resolve how  
250 differences in the mode of silencer action are encoded.

251 Morphological evolution often results from loss of tissue-specific expression following enhancer  
252 inactivation (Chan et al., 2010; Jeong et al., 2006; Prud'homme et al., 2006). An extreme example  
253 is the evolution of trichome patterns in *D. sechellia*, which involved the parallel inactivation of mul-  
254 tiple enhancers of the *shavenbaby* gene (McGregor et al., 2007). Our results thus provide a distinct  
255 counterexample in which the dark pigmentation of *D. pseudoobscura* might have evolved through  
256 strong repression of *ebony* while preserving enhancer functionality (Figure 5B). These two paths  
257 to evolution would appear to differ in the number of required steps, as inactivation of multiple  
258 enhancers would likely involve more mutations than changes to a global silencer. However, it is  
259 important to remember that experimental biases towards enhancer studies, as discussed below,  
260 may skew our interpretations.

## 261 **Transcriptional silencers and morphological evolution**

262 Is the trend of silencer evolution at *ebony* an exception? It is our opinion that the *Drosophila* ab-  
263 domen reflects an opportune system in which to notice repressive mechanisms that may be more  
264 prevalent than currently expected. Compared to microscopic tissues with three-dimensional com-  
265 plexity such as the embryo or imaginal disc, the abdomen is a relatively simple two-dimensional  
266 canvas in which even slight deviations of a reporter gene pattern from the endogenous expression  
267 pattern can be easily detected. Thus, a gene subject to silencer regulation, such as *ebony* would be  
268 easier to detect in this system.

269 The enhancer-centric way that gene regulatory evolution is studied is also skewed to overlook  
270 the potential role of silencers. When a difference in gene expression is found between distantly  
271 related species, the only way to determine whether those differences are caused by *cis*-regulatory  
272 evolution is to find the responsible enhancer(s) and ask whether they have differing activities us-  
273 ing gene reporter constructs tested in a common genetic background (Rebeiz and Williams, 2012;  
274 Rebeiz et al., 2015). If the reporter genes recapitulate differences in expression observed within  
275 these species, such a result would be consistent with a *cis*-regulatory basis for these evolutionary  
276 differences. On the other hand, interspecific differences in enhancer-reporter expression are often  
277 attributed to *trans*-regulatory evolution. And yet, it may well be that these differences are actually  
278 encoded by *cis*-regulatory changes affecting silencer function. Considering the relative difficulty  
279 of finding and testing silencers (Halfon, 2020; Segert et al., 2021), it stands to reason that these  
280 modes of regulatory evolution are likely to be much more common than previously appreciated.  
281 Genomic surveys of open chromatin may offer an avenue to identify silencers and other regulatory  
282 elements. Indeed, in the butterfly wing, the endogenous deletion of an ATAC-seq peak region was  
283 associated with expanded expression, consistent with silencer function (Lewis et al., 2019). Thus,  
284 as the field of evolutionary-developmental biology seeks to further understand the *cis*-regulatory  
285 basis for morphological evolution, it will almost certainly have to contend with silencers and other

286 long-distance interacting elements as needles in a vast regulatory sequence's haystack.

## 287 **Methods and Materials**

### 288 ***Drosophila* strains and culture conditions**

289 Fly stocks were reared using standard culture conditions. Wild type species used in this study were  
290 obtained from the University of California, San Diego *Drosophila* Stock Center (now known as The  
291 National *Drosophila* Species Stock Center at Cornell University) (*Drosophila ananassae* #14024-0371.13,  
292 *Drosophila malerkotliana* #14024-0391.00, *Drosophila pseudoobscura* #14011-0121.87). The follow-  
293 ing were obtained from the Bloomington *Drosophila* stock center: *nos-Cas9 (attP40)* (#78781), *cre(III)*  
294 (#1501), double balancer (#3703), and  $\phi$  *C31(X)* (#34772). A *D. melanogaster yellow white (yw)* strain  
295 that was isogenized for eight generations and was used to normalize the backgrounds of GFP re-  
296 porter transgenes. The line used as WT was created by crossing the *yw* strain with the double  
297 balancer line and was used to compare with CRISPR-Cas9 engineered lines.

### 298 **CRISPR-Cas9 genome editing**

#### 299 Design of single guide RNAs (sgRNAs)

300 To avoid possible off-target effects, sgRNAs were designed using the CRISPR Optimal Target Finder  
301 (<http://targetfinder.flycrispr.neuro.brown.edu/>) and synthesized in vitro. Briefly, 20 nt target-specific  
302 primers were designed containing the T7 promoter sequence (upstream) and an overlap with the  
303 sgRNA scaffold (downstream). Each target-specific primer was combined with three primers for an  
304 overlap extension PCR (0.4 mM each) to generate a 130 bp DNA template. After purification, the  
305 template was used for in vitro transcription using EnGen sgRNA synthesis Kit (NEB), and the reac-  
306 tion was cleaned up using the MEGACLEAR Transcription Clean-Up KIT (Thermo). See key resources  
307 table for primers sequences.

#### 308 Donor vectors for homologous directed repair

309 Homology arms (1.5-2 kb each) were amplified from the *D. melanogaster* strain to be injected and  
310 inserted into plasmids containing fluorescent eye markers using NEBuilder Hi-Fi DNA assembly  
311 (NEB). See key resources table for primers sequences and donor plasmids.

#### 312 *Drosophila* microinjections

313 CRISPR-Cas9 injections were performed in house following standard protocols (ref). All concentra-  
314 tions are given as final values in the injection mix. For the *ebony* loss of function strain, we injected  
315 a mix containing a sgRNA targeting the first exon (100 ng/ $\mu$ l), and the plasmids *pCRISPaint-sfGFP-*  
316 *3xP3-RFP* (Addgene 127566) and *pCFD5-frame\_selector\_0,1,2* (Addgene 131152; 400 ng/ $\mu$ l each) into  
317 *nos-Cas9 (attP40)*. This resulted in the insertion of *pCRISPaint-sfGFP-3xP3-RFP* in the first exon via  
318 non-homologous end joining, leading to a loss of function allele (**Bosch et al., 2020**).

319 For deletions of the *ebony* non-coding regions, we injected a mix containing the donor vector  
320 (500 ng/ $\mu$ l) and one to three sgRNAs flanking each side of the targeted region (100 ng/ $\mu$ l each). For  
321 eAct $\Delta$ , eMaleSil $\Delta$ , and eActB + In.4 $\Delta$ , and eUps + In.4 $\Delta$ , the EnGen Spy Cas9 NLS (NEB) was added  
322 to the mix. eActB $\Delta$ , eUps $\Delta$ , and eIn.4 $\Delta$  were obtained by injecting into the *nos-Cas9(attP40)* strain  
323 (BDSC 78781). The progeny of each injected fertile individual was screened for dsRed, RFP or GFP  
324 fluorescence in the eyes and the correct genomic incorporation of this marker was confirmed by  
325 PCR followed by sequencing (see key resources table for primers sequences). Transformant individ-  
326 uals were crossed with a *yw* strain to remove the *nos-Cas9* transgene, and with a third chromosome  
327 balancer strain (BDSC 3703) to produce a stable homozygous line.

### 328 **Pigmentation quantification**

329 Representative images of the adult pigmentation patterns of each genotype were prepared from  
330 7- to 8-day-old adults. To quantify the abdominal pigmentation, 10 cuticle preparations (REF) from  
331 adult flies were used for each genotype and sex. Briefly, flies were aged to 7-8 days old and stored

332 for 2-3 days in ethanol 75% before dissection. Abdominal cuticles were cut through the dorsal  
333 midline, which is therefore not visible in the preparations. After dissection, cuticles were mounted  
334 in PVA mounting medium (Bioquip). Cuticle preparations were imaged using a Leica M205C Stereo  
335 Microscope with a DFC425C camera. Image analysis was performed in ImageJ (*Abràmoff et al.,*  
336 *2004*). Images were blinded using the ImageJ extension LabCode, a region of interest was drawn in  
337 the anterior part of each abdominal segment using the freehand selection and the mean grayscale  
338 darkness was obtained. The relative darkness was calculated as:  $(255\text{-grayscale darkness})/255 \times$   
339  $100$  (*Rebeiz et al., 2009*). Boxplots were created using the R (*R Core Team, 2022*) packages ggplot2  
340 (*Wickham, 2016*) and ggpubr (*Kassambara, 2020*).

### 341 ***in-situ* hybridization**

342 *in-situ* hybridization was performed as described in (*Liu et al., 2019*) with small modifications. In  
343 brief, flies were collected no more than 30 minutes after eclosion, dissected in cold PBS, and fixed in  
344 PBS containing 4% paraformaldehyde (E.M.S. Scientific) and 0.1% Triton X-100. PCR was performed  
345 to generate an RNA probe template that had a T7 promoter appended through primer design  
346 (see key resources table for primers sequences used). Digoxigenin-labeled probes were generated  
347 using a 10X Dig labeling mix (Roche Diagnostics) and T7 RNA polymerase (Promega). Dissected  
348 samples were probed using an *in-situ* hybridization robot (Intavis).

### 349 **GFP transgenic reporters**

350 *ebony* non-coding regions from different species were amplified via PCR and cloned into the S3AG  
351 vector using NEBuilder Hi-Fi DNA assembly (NEB) (Table X). *D. melanogaster* transformant lines were  
352 generated by  $\Phi$ C31 mediated site specific recombination into the 51D insertion site on the second  
353 chromosome. Injections were performed by BestGene Inc. For all reporters, samples were aged  
354 24h after eclosion and mounted in halocarbon oil 700 (SIGMA). Images were taken using an Olym-  
355 pus Fluoview 1000 confocal microscope. Samples were imaged with standard settings in which  
356 the brightest samples were not saturated. GFP expression was quantified using ImageJ (*Abràmoff*  
357 *et al., 2004*). The pixel intensity of a squared region was measured in the anterior part of A4, the  
358 posterior part of A4 and in the middle part of A5. The stripe silencing activity was calculated as  
359 the intensity of the posterior part of A4 divided by the intensity of the posterior part of A4. The A5  
360 silencing activity was calculated as the intensity of the A45 segment divided by the intensity of the  
361 A4 segment.

### 362 **Acknowledgments**

363 The authors thank the members of the M.R. laboratory for their comments and discussion on  
364 the manuscript. We thank the Bloomington stock center, the National Drosophila Species Stock  
365 center for fly stocks, and Stephanie Day for help cloning reporter lines. This work was supported  
366 by funding from the NIH (R35GM14196 to MR) and the NSF (IOS2211833 to TMW)

### 367 **Competing interests**

368 No competing interests declared.

### 369 **Author Contributions**

370 Iván D. Méndez González, Conceptualization, Data curation, Formal analysis, Validation, Investiga-  
371 tion, Visualization, Methodology, Writing - original draft, Writing - review and editing; Thomas M.  
372 Williams, Conceptualization, Supervision, Funding acquisition, Methodology, Writing - review and  
373 editing; Mark Rebeiz, Conceptualization, Supervision, Funding acquisition, Methodology, Writing -  
374 review and editing.

## References

- 375  
376 **Abramoff MD**, Magalhães PJ, Ram SJ. Image processing with ImageJ. *Biophotonics international*. 2004; 11(7):36–  
377 42.
- 378 **Akiyama N**, Sato S, Tanaka KM, Sakai T, Takahashi A. The role of the epidermis enhancer element in positive  
379 and negative transcriptional regulation of ebony in *Drosophila melanogaster*. *G3*. 2022; 12(3):jkac010.
- 380 **Barolo S**. Shadow enhancers: frequently asked questions about distributed cis-regulatory information and  
381 enhancer redundancy. *Bioessays*. 2012; 34(2):135–141.
- 382 **Bosch JA**, Colbeth R, Zirin J, Perrimon N. Gene knock-ins in *Drosophila* using homology-independent insertion  
383 of universal donor plasmids. *Genetics*. 2020; 214(1):75–89.
- 384 **Brand AH**, Breeden L, Abraham J, Sternglanz R, Nasmyth K. Characterization of a “silencer” in yeast: a DNA  
385 sequence with properties opposite to those of a transcriptional enhancer. *Cell*. 1985; 41(1):41–48.
- 386 **Camino EM**, Butts JC, Ordway A, Vellky JE, Rebeiz M, Williams TM. The evolutionary origination and diversifi-  
387 cation of a dimorphic gene regulatory network through parallel innovations in cis and trans. *PLoS genetics*.  
388 2015; 11(4):e1005136.
- 389 **Carroll SB**. Evo-devo and an expanding evolutionary synthesis: a genetic theory of morphological evolution.  
390 *Cell*. 2008; 134(1):25–36.
- 391 **Chan YF**, Marks ME, Jones FC, Villarreal Jr G, Shapiro MD, Brady SD, Southwick AM, Absher DM, Grimwood  
392 J, Schmutz J, et al. Adaptive evolution of pelvic reduction in sticklebacks by recurrent deletion of a Pitx1  
393 enhancer. *science*. 2010; 327(5963):302–305.
- 394 **Gisselbrecht SS**, Palagi A, Kurland JV, Rogers JM, Ozadam H, Zhan Y, Dekker J, Bulyk ML. Transcriptional silencers  
395 in *Drosophila* serve a dual role as transcriptional enhancers in alternate cellular contexts. *Molecular cell*.  
396 2020; 77(2):324–337.
- 397 **Halfon MS**. Silencers, enhancers, and the multifunctional regulatory genome. *Trends in Genetics*. 2020;  
398 36(3):149–151.
- 399 **Howard ML**, Davidson EH. cis-Regulatory control circuits in development. *Developmental biology*. 2004;  
400 271(1):109–118.
- 401 **Hughes JT**, Williams ME, Johnson R, Grover S, Rebeiz M, Williams TM. Gene regulatory network homoplasy  
402 underlies recurrent sexually dimorphic fruit fly pigmentation. *Frontiers in Ecology and Evolution*. 2020; 8:80.
- 403 **Jacob F**, Monod J. Genetic regulatory mechanisms in the synthesis of proteins. *Journal of molecular biology*.  
404 1961; 3(3):318–356.
- 405 **Jeong S**, Rokas A, Carroll SB. Regulation of body pigmentation by the Abdominal-B Hox protein and its gain  
406 and loss in *Drosophila* evolution. *Cell*. 2006; 125(7):1387–1399.
- 407 **Johnson AD**. The price of repression. *Cell*. 1995; 81(5):655–658.
- 408 **Johnson WC**, Ordway AJ, Watada M, Pruitt JN, Williams TM, Rebeiz M. Genetic changes to a transcriptional  
409 silencer element confers phenotypic diversity within and between *Drosophila* species. *PLoS genetics*. 2015;  
410 11(6):e1005279.
- 411 **Kassambara A**. ggpubr: ‘ggplot2’ Based Publication Ready Plots; 2020, [https://CRAN.R-project.org/package=](https://CRAN.R-project.org/package=ggpubr)  
412 [ggpubr](https://CRAN.R-project.org/package=ggpubr), r package version 0.4.0.
- 413 **Lewis JJ**, Geltman RC, Pollak PC, Rondem KE, Van Belleghem SM, Hubisz MJ, Munn PR, Zhang L, Benson C, Mazo-  
414 Vargas A, et al. Parallel evolution of ancient, pleiotropic enhancers underlies butterfly wing pattern mimicry.  
415 *Proceedings of the National Academy of Sciences*. 2019; 116(48):24174–24183.
- 416 **Liu Y**, Ramos-Womack M, Han C, Reilly P, Brackett KL, Rogers W, Williams TM, Andolfatto P, Stern DL, Rebeiz M.  
417 Changes throughout a genetic network mask the contribution of Hox gene evolution. *Current Biology*. 2019;  
418 29(13):2157–2166.
- 419 **Lopez-Rivera F**, Foster Rhoades OK, Vincent BJ, Pym EC, Bragdon MD, Estrada J, DePace AH, Wunderlich Z. A  
420 mutation in the *Drosophila melanogaster* eve stripe 2 minimal enhancer is buffered by flanking sequences.  
421 *G3: Genes, Genomes, Genetics*. 2020; 10(12):4473–4482.



- 422 **Markow TA**, O'Grady P. *Drosophila: a guide to species identification and use*. Elsevier; 2005.
- 423 **McGregor AP**, Orgogozo V, Delon I, Zanet J, Srinivasan DG, Payre F, Stern DL. Morphological evolution through  
424 multiple cis-regulatory mutations at a single gene. *Nature*. 2007; 448(7153):587–590.
- 425 **Ngan CY**, Wong CH, Tjong H, Wang W, Goldfeder RL, Choi C, He H, Gong L, Lin J, Urban B, et al. Chromatin  
426 interaction analyses elucidate the roles of PRC2-bound silencers in mouse development. *Nature genetics*.  
427 2020; 52(3):264–272.
- 428 **Ordway AJ**, Hancuch KN, Johnson W, Williams TM, Rebeiz M. The expansion of body coloration involves coor-  
429 dinated evolution in cis and trans within the pigmentation regulatory network of *Drosophila prostipennis*.  
430 *Developmental biology*. 2014; 392(2):431–440.
- 431 **Pang B**, Snyder MP. Systematic identification of silencers in human cells. *Nature genetics*. 2020; 52(3):254–263.
- 432 **Payankulam S**, Li LM, Arnosti DN. Transcriptional repression: conserved and evolved features. *Current*  
433 *biology*. 2010; 20(17):R764–R771.
- 434 **Prud'homme B**, Gompel N, Rokas A, Kassner VA, Williams TM, Yeh SD, True JR, Carroll SB. Repeated morpho-  
435 logical evolution through cis-regulatory changes in a pleiotropic gene. *Nature*. 2006; 440(7087):1050–1053.
- 436 **R Core Team**. R: A Language and Environment for Statistical Computing. R Foundation for Statistical Computing,  
437 Vienna, Austria; 2022, <https://www.R-project.org/>.
- 438 **Rebeiz M**, Patel NH, Hinman VF. Unraveling the tangled skein: the evolution of transcriptional regulatory  
439 networks in development. *Annual review of genomics and human genetics*. 2015; 16:103.
- 440 **Rebeiz M**, Pool JE, Kassner VA, Aquadro CF, Carroll SB. Stepwise modification of a modular enhancer underlies  
441 adaptation in a *Drosophila* population. *Science*. 2009; 326(5960):1663–1667.
- 442 **Rebeiz M**, Williams TM. Experimental approaches to evaluate the contributions of candidate cis-regulatory  
443 mutations to phenotypic evolution. *Molecular Methods for Evolutionary Genetics*. 2012; p. 351–375.
- 444 **Rebeiz M**, Williams TM. Using *Drosophila* pigmentation traits to study the mechanisms of cis-regulatory evolu-  
445 tion. *Current Opinion in Insect Science*. 2017; 19:1–7.
- 446 **Segert JA**, Gisselbrecht SS, Bulyk ML. Transcriptional silencers: Driving gene expression with the brakes on.  
447 *Trends in Genetics*. 2021; 37(6):514–527.
- 448 **Sengupta AK**, Kuhrs A, Muller J. General transcriptional silencing by a Polycomb response element in  
449 *Drosophila*. *Development*. 2004; .
- 450 **Shashikant T**, Ettensohn CA. Genome-wide analysis of chromatin accessibility using ATAC-seq. *Methods in cell*  
451 *biology*. 2019; 151:219–235.
- 452 **Signor SA**, Liu Y, Rebeiz M, Kopp A. Genetic convergence in the evolution of male-specific color patterns in  
453 *Drosophila*. *Current Biology*. 2016; 26(18):2423–2433.
- 454 **Voutev R**, Mann RS. Robust  $\Phi$ C31-mediated genome engineering in *Drosophila melanogaster* using minimal  
455 attP/attB phage sites. *G3: Genes, Genomes, Genetics*. 2018; 8(5):1399–1402.
- 456 **Wickham H**. *ggplot2: Elegant Graphics for Data Analysis*. Springer-Verlag New York; 2016. <https://ggplot2.tidyverse.org>.
- 457 [tidyverse.org](https://ggplot2.tidyverse.org).
- 458 **Wittkopp PJ**, Kalay G. Cis-regulatory elements: molecular mechanisms and evolutionary processes underlying  
459 divergence. *Nature Reviews Genetics*. 2012; 13(1):59–69.
- 460 **Wittkopp PJ**, True JR, Carroll SB. Reciprocal functions of the *Drosophila* yellow and ebony proteins in the  
461 development and evolution of pigment patterns. *Development*. 2002; .
- 462 **Wittkopp PJ**, Vaccaro K, Carroll SB. Evolution of yellow gene regulation and pigmentation in *Drosophila*. *Current*  
463 *Biology*. 2002; 12(18):1547–1556.
- 464 **Yokoshi M**, Segawa K, Fukaya T. Visualizing the role of boundary elements in enhancer-promoter communica-  
465 tion. *Molecular cell*. 2020; 78(2):224–235.

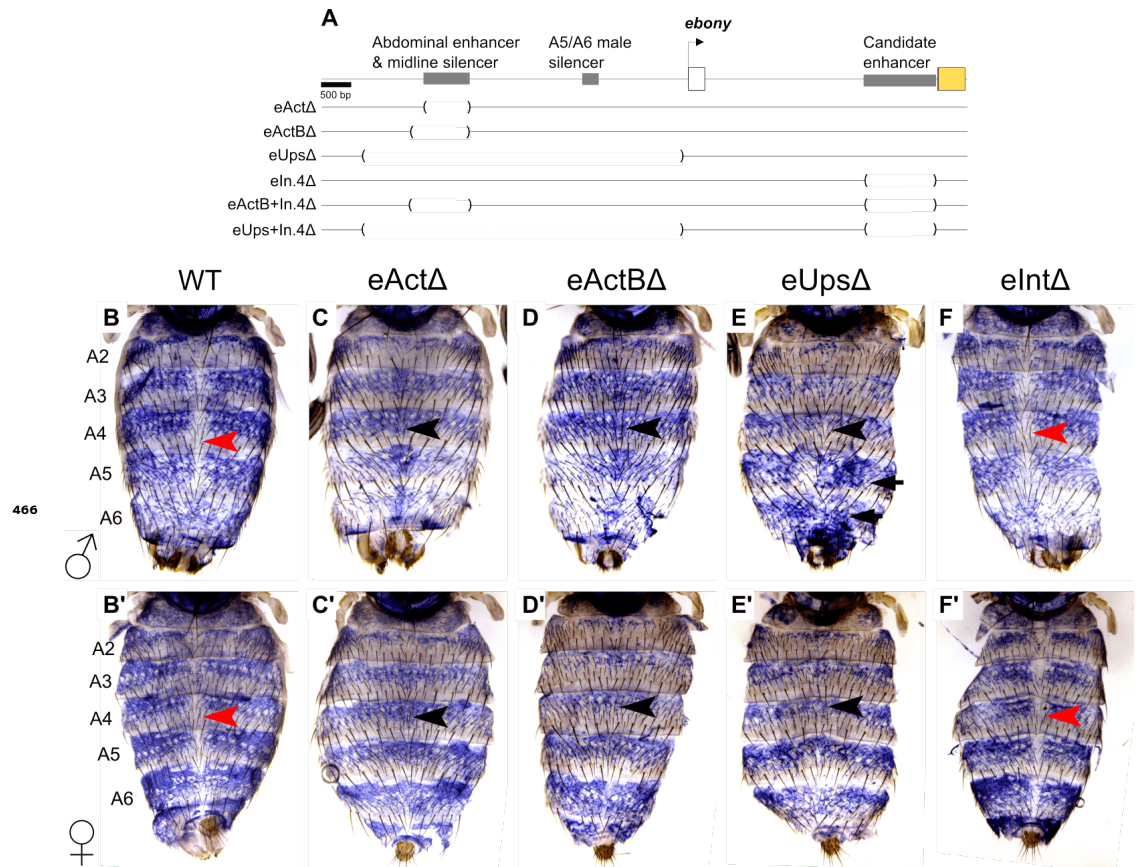

**Figure 2-Figure supplement 1. (A)** Gene map of the *ebony* locus showing the location of the deletions created to identify redundant enhancers. **(B-F')** *ebony* abdominal mRNA expression measured with *in-situ* hybridization in recently eclosed adults for WT, *ebony* null mutants, and deletion lines males and females

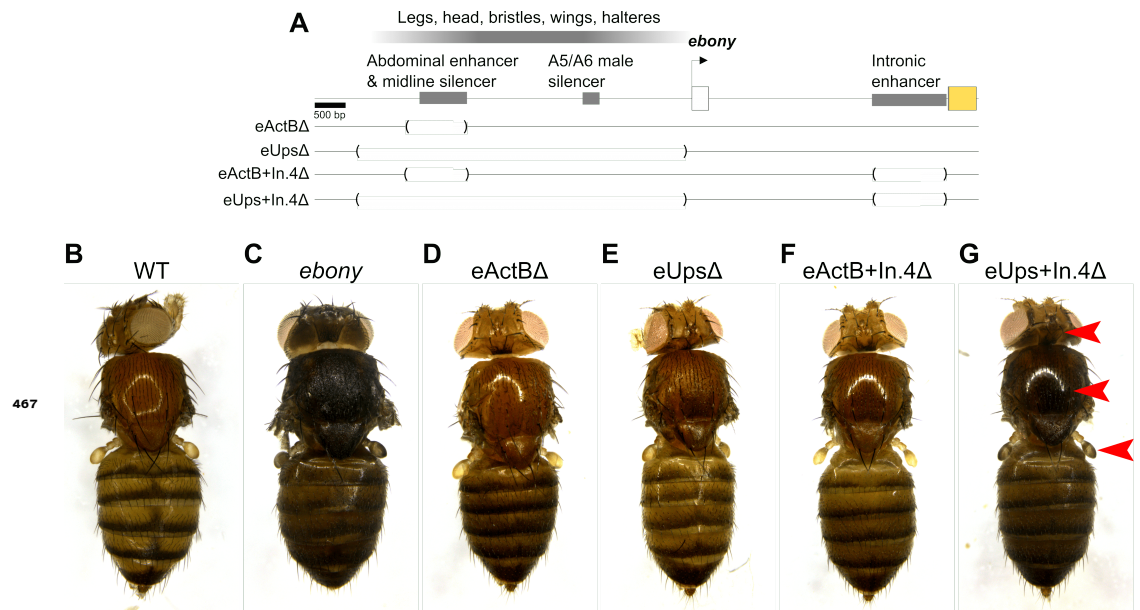

**Figure 2-Figure supplement 2.** (A) Gene map of the *ebony* locus showing the location of the deletions created to identify redundant enhancers. Previously identified tissue-specific enhancers are shown on top of the *ebony* upstream region (shaded rectangle). (B-G) Pigmentation of different adult tissues in females from the different strains created. Red arrows show tissues, other than the abdomen, with darker pigmentation compared to the WT and more similar to *ebony* mutants.

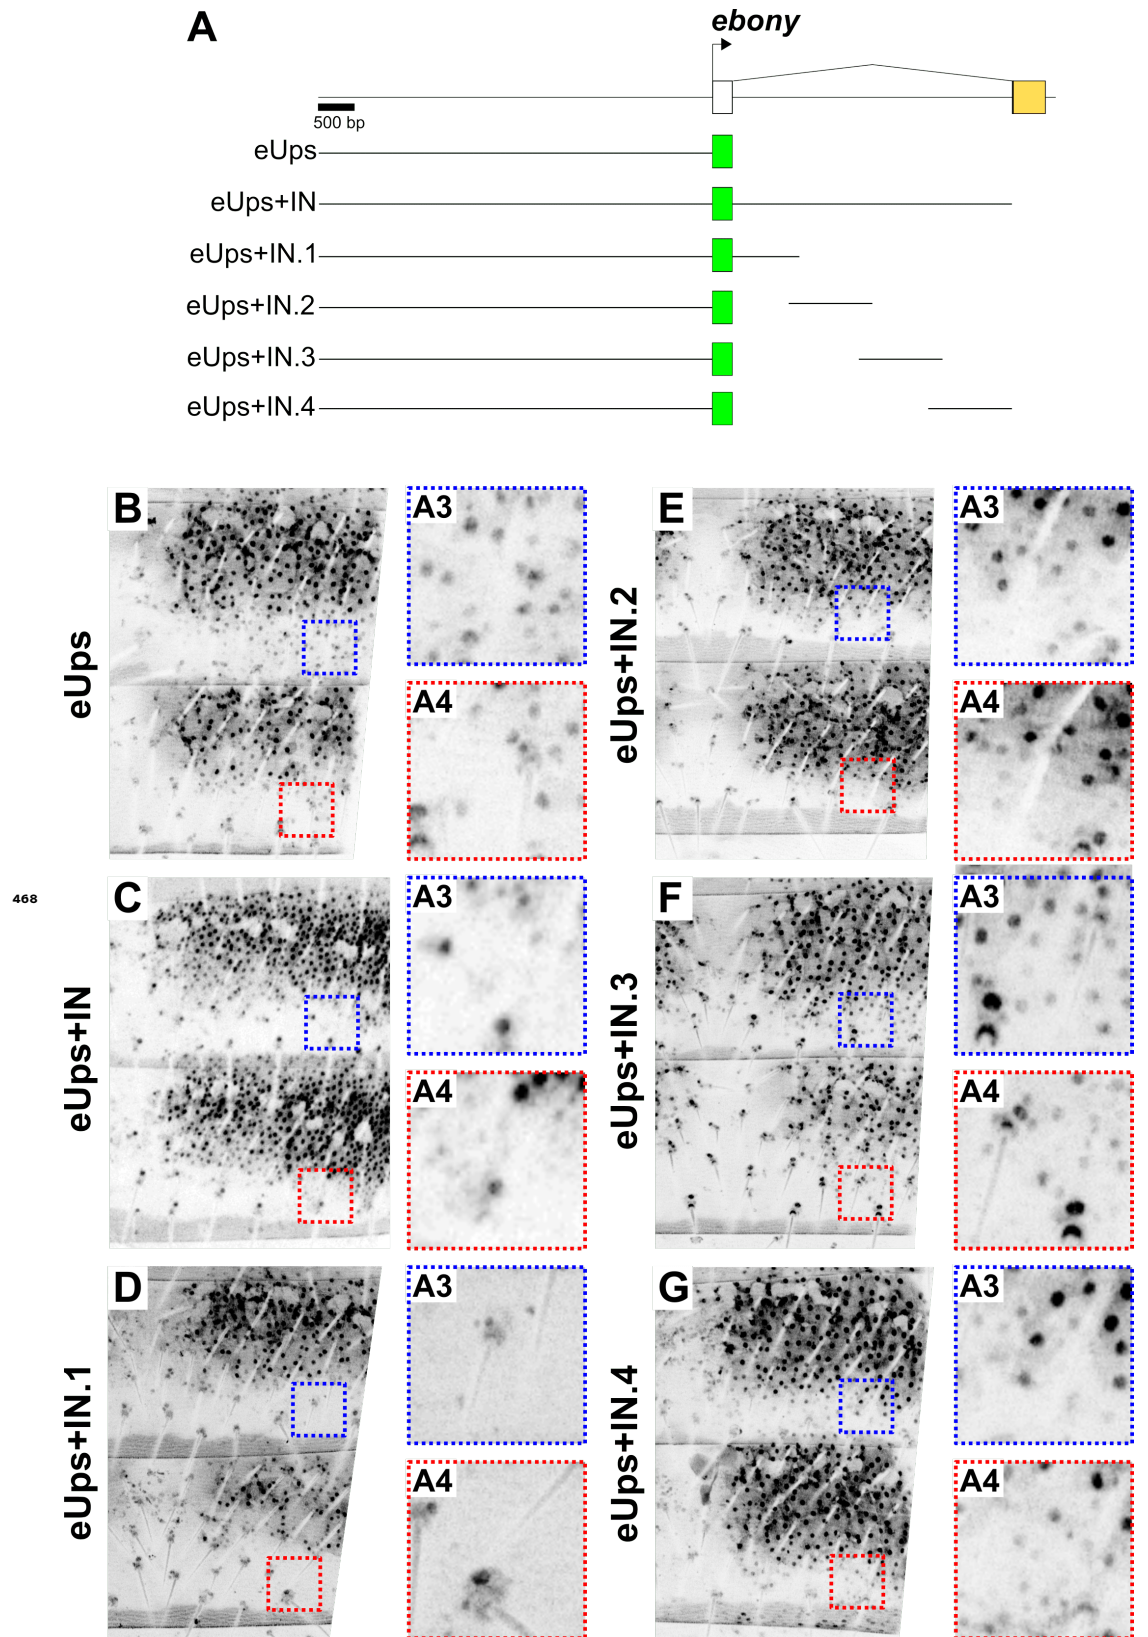

**Figure 3-Figure supplement 1.** (A) Gene map of the *ebony* locus showing the location of the reporter constructs created to identify the stripe silencer within the first intronic region. (B-G) GFP expression pattern of the different transgenic reporters at 24h after eclosion. Blue and red dashed boxes show a magnification of the stripe area in A3 and A4, respectively.



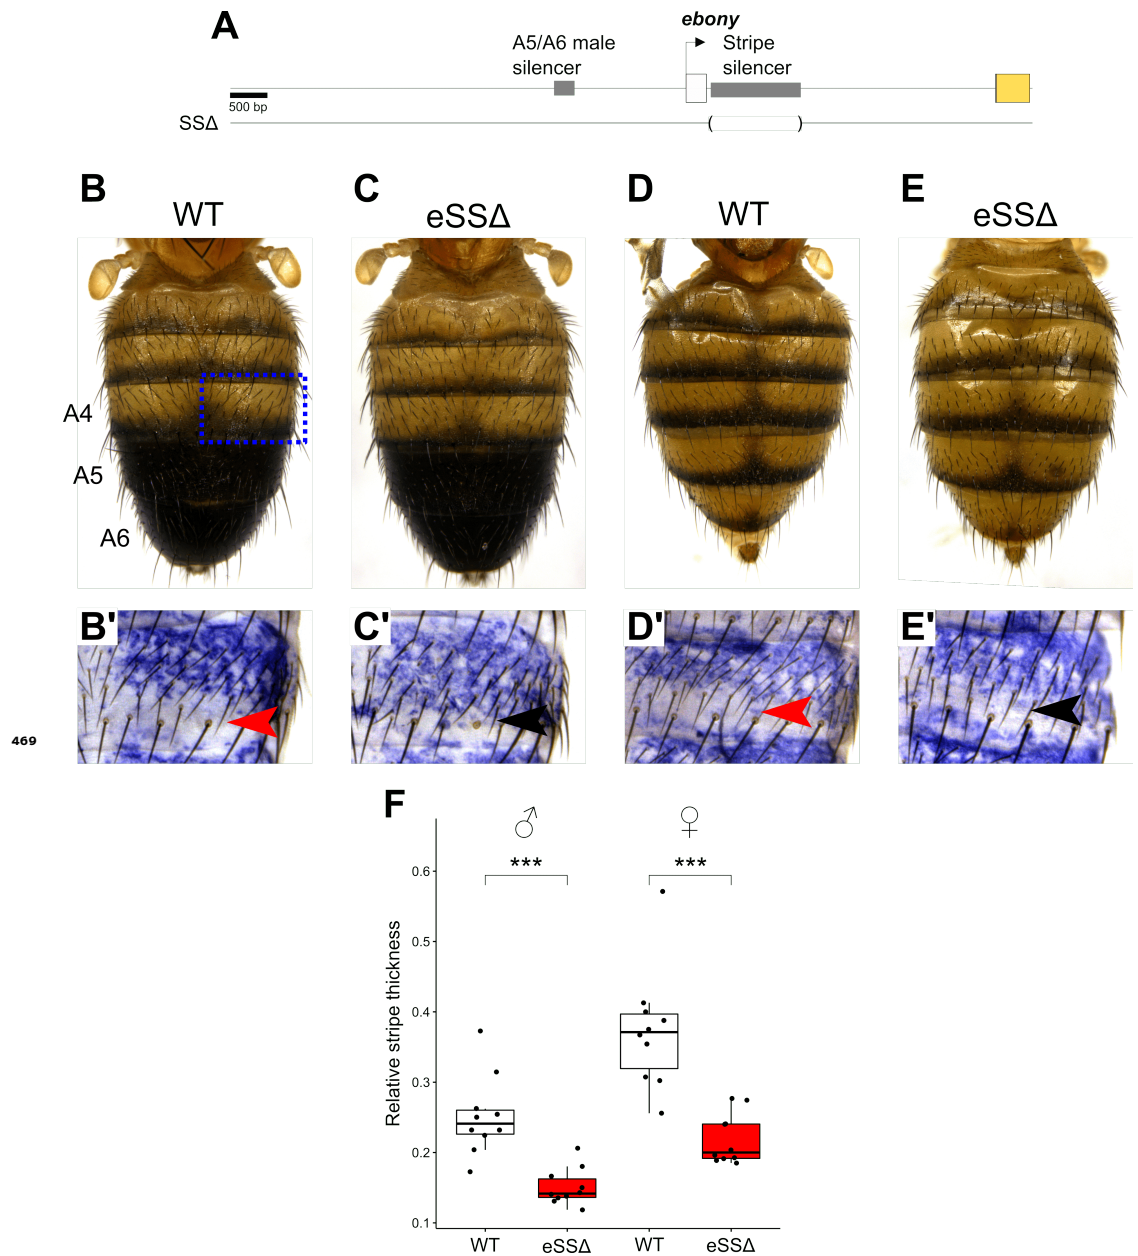

**Figure 3-Figure supplement 2.** (A) Gene map of the *ebony* locus showing the location of the deletion targeting the stripe silencer (*eSSΔ*). (B-E) Adult pigmentation of WT (B) and *eSSΔ*(C) males and females. (B'-E') *In-situ* hybridization detecting *ebony mRNA* in the A4 segment of WT (B') and *eSSΔ*males and females. Red and black arrowheads indicate low and increased levels of *ebony mRNA*, respectively. (F) Comparison of the relative thickness of the melanic stripe between WT and *eSSΔ*males and females. (Student's t test, \*\*\* =  $p < 0.0005$ )



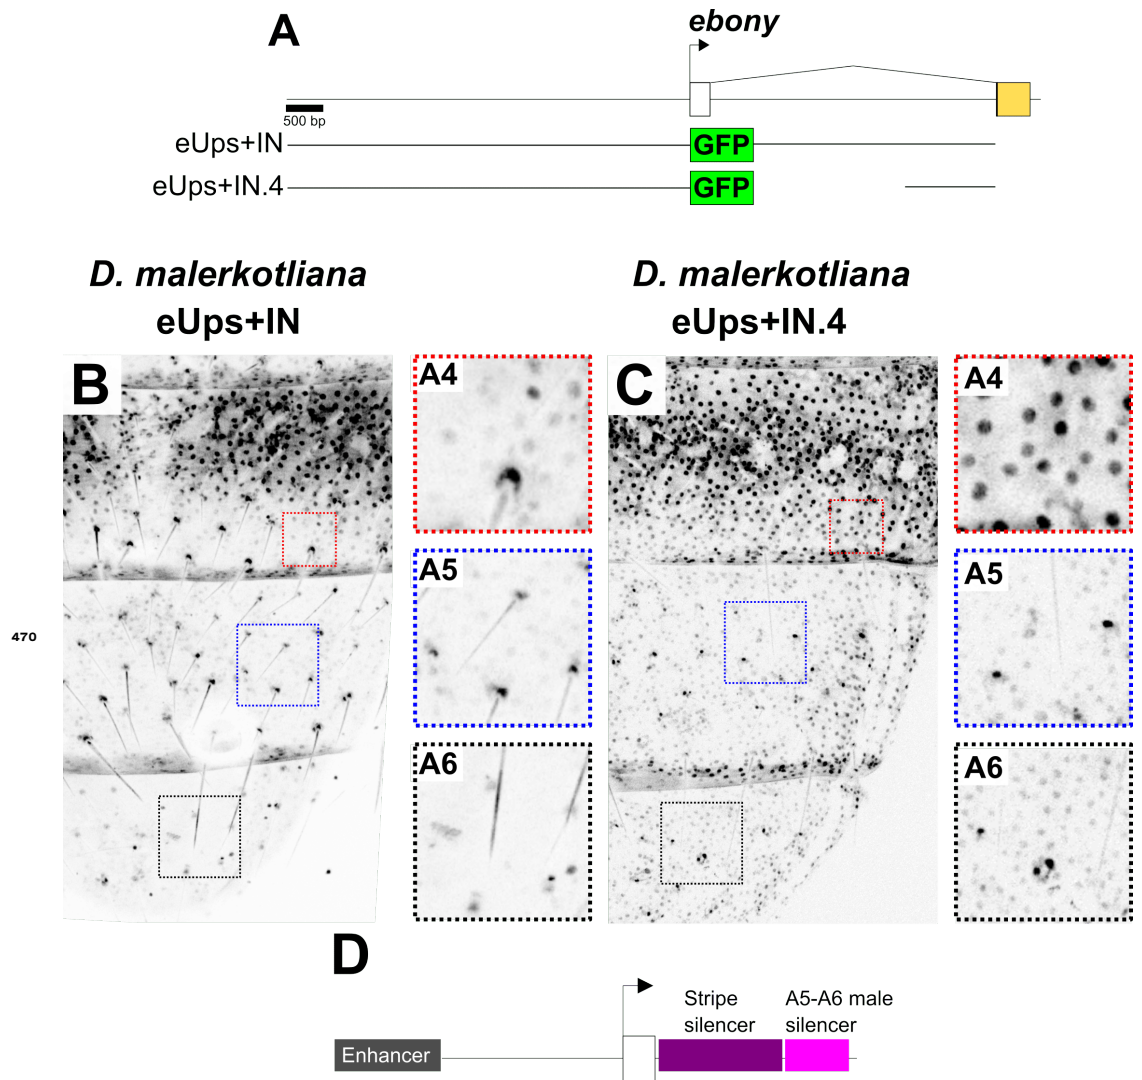

**Figure 4–Figure supplement 1. (A)** Gene map showing the reporter constructs created to identify the location of the *D. malerkotliana* male silencer within the first *ebony* intron. **(B–C)** GFP expression pattern of *D. malerkotliana* transgenic reporter eUps+IN and eUps+IN.4. Boxed regions show expression in A4 stripe region (red), and A5-A6 segments (blue and black, respectively). **(D)** Inferred location of the *D. malerkotliana* intronic silencer within the first *ebony* intron.

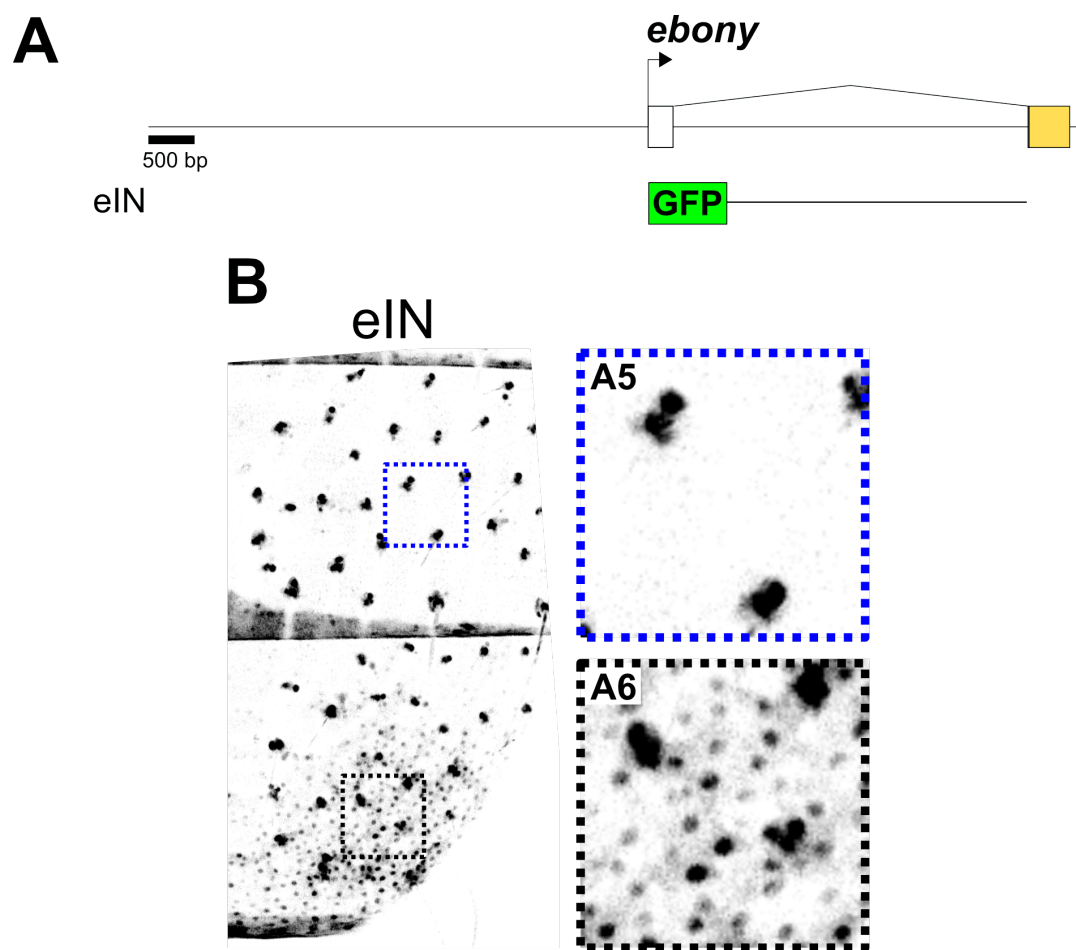

**Figure 4-Figure supplement 2. (A)** Gene map showing the reporter constructs created for *D. pseudoobscura*. **(B)** GFP expression patterns of *D. pseudoobscura* transgenic reporter eIN.

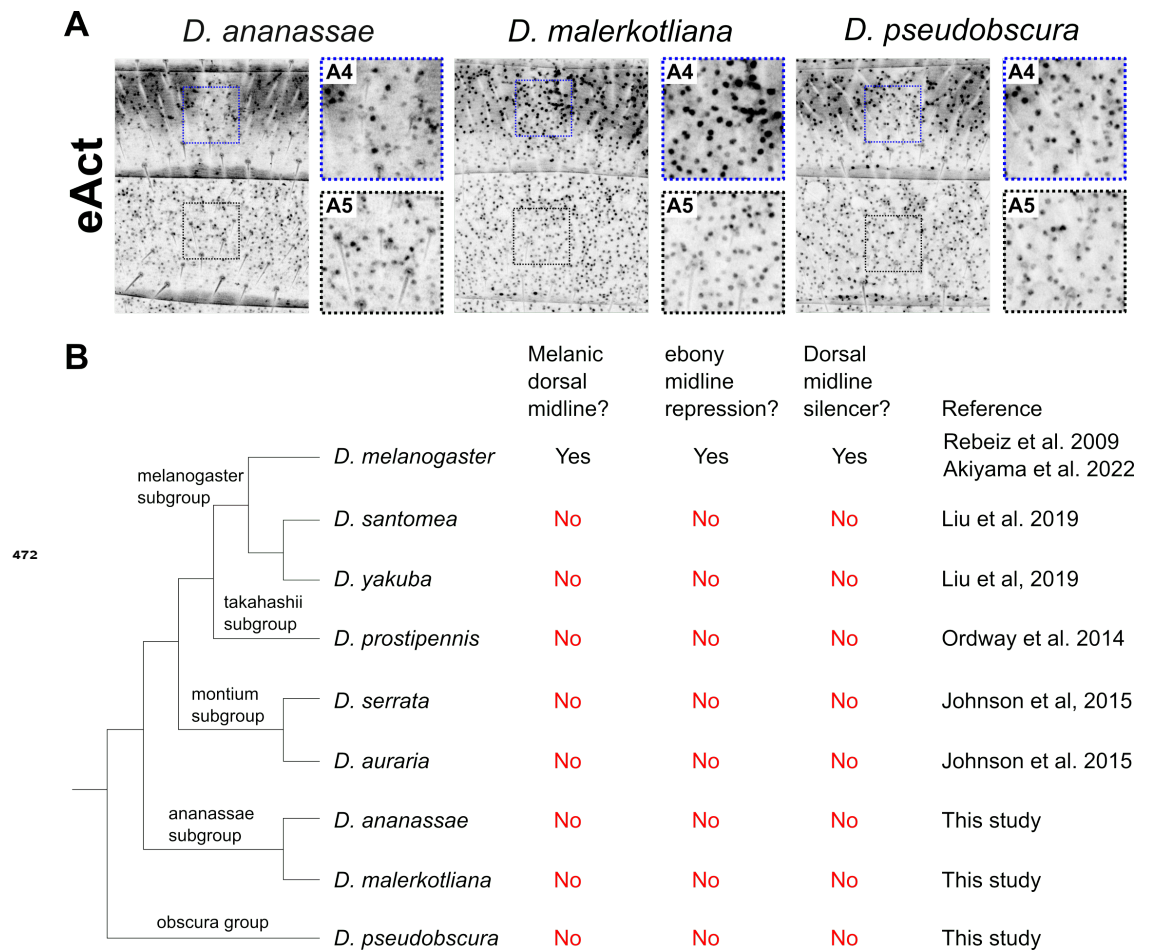

**Figure 4-Figure supplement 3. (A)** GFP expression patterns of the eAct transgenic reporters in the abdominal segments A4-A5. Insets show magnified regions along the midline for A4 (red square) and A5 (blue square). **(B)** Phylogenetic distribution of the melanic dorsal midline in *Drosophila* species for which the expression and regulation of *ebony* in this area has been studied.
